# Supplementary material for: sRAGE and Risk of Diabetes, Cardiovascular Disease, and Death
Source: PubMed Central journal article supplement — Diabetes. 2013 May 17;62(6):2116–21. doi: 10.2337/db12-1528 (PMC3661610; doi:10.2337/db12-1528), 2013-05-17

SUPPLEMENTARY DATA

**Supplementary Table 1.** Spearman correlation coefficient matrix of sRAGE with selected baseline variables.

|                                                 | N    | Spearman's rho |
|-------------------------------------------------|------|----------------|
| Age (years)                                     | 1201 | -0.0078        |
| Fasting Glucose (mg/dL)                         | 1168 | -0.218         |
| Hemoglobin A1c (%)                              | 1185 | -0.2187        |
| Total Cholesterol (mg/dL)                       | 1201 | -0.0491        |
| HDL-Cholesterol (mg/dL)                         | 1201 | 0.0636         |
| Average Systolic BP (mmHg)                      | 1201 | -0.1831        |
| Body Mass Index (kg/m <sup>2</sup> )            | 1201 | -0.3246        |
| C-reactive Protein (mg/L)                       | 1201 | -0.2548        |
| White Blood Cell Count (x1000/mm <sup>3</sup> ) | 1200 | -0.1172        |

**Supplementary Table 2.** Unadjusted and adjusted Prevalence Ratios (PRs) for the lowest quartile of sRAGE.

|                                                      | Unadjusted PR | 95% CI for unadjusted PR | Adjusted PR | 95% CI for adjusted PR |
|------------------------------------------------------|---------------|--------------------------|-------------|------------------------|
| Age - per 10 years                                   | 1.02          | (0.84, 1.24)             | 1.05        | (0.85, 1.29)           |
| Male (vs female)                                     | 1.32          | (1.05, 1.66)*            | 1.53        | (1.19, 1.96)*          |
| Black (vs white)                                     | 3.07          | (2.44, 3.85)*            | 2.78        | (2.17, 3.55)*          |
| Cigarette Smoking                                    |               |                          |             |                        |
| Current Smoker (vs never)                            | 0.95          | (0.67, 1.34)             | 0.97        | (0.67, 1.41)           |
| Former Smoker (vs never)                             | 1.41          | (1.10, 1.81)*            | 1.40        | (1.08, 1.83)*          |
| Total Cholesterol ≥ 200 mg/dL (vs < 200 mg/dL)       | 1.03          | (0.82, 1.30)             | 1.10        | (0.87, 1.39)           |
| Low HDL Cholesterol†                                 | 0.98          | (0.78, 1.24)             | 0.91        | (0.72, 1.16)           |
| Hypertension‡                                        | 1.71          | (1.37, 2.15)*            | 1.09        | (0.85, 1.39)           |
| Body Mass Index (BMI)                                |               |                          |             |                        |
| 25-30 kg/m <sup>2</sup> (vs < 25 kg/m <sup>2</sup> ) | 1.69          | (1.21, 2.35)*            | 1.33        | (0.94, 1.87)           |
| ≥ 30 kg/m <sup>2</sup> (vs < 25 kg/m <sup>2</sup> )  | 3.00          | (2.18, 4.12)*            | 1.90        | (1.33, 2.73)*          |
| C-reactive protein                                   |               |                          |             |                        |
| 1-3 mg/L (vs < 1 mg/L)                               | 1.69          | (1.19, 2.39)*            | 1.48        | (1.04, 2.10)*          |
| ≥3 mg/L (vs < 1 mg/L)                                | 2.51          | (1.82, 3.47)*            | 1.93        | (1.35, 2.75)*          |
| Diabetes§                                            | 1.68          | (1.26, 2.24)*            | 0.95        | (0.70, 1.30)           |

\* p-value < 0.05

† Low HDL-cholesterol was defined as < 40 mg/dL in males and < 50 mg/dL in females.

‡ Diastolic blood pressure ≥ 90 mmHg, systolic blood pressure ≥ 140 mmHg, or blood pressure-lowering medication use

SUPPLEMENTARY DATA

§ Non-fasting glucose  $\geq$  200 mg/dL, fasting glucose  $\geq$  126 mg/dL, self-reported diagnosis, medication use, or HbA1c  $\geq$  6.5%

**Supplementary Table 3.** Hazard ratios by incident diabetes, coronary heart disease, ischemic stroke, and mortality by sRAGE quartile excluding cases with diagnosed and undiagnosed diabetes at baseline.

|                                     | # of Events | HR Model 1†        | HR Model 2‡        |
|-------------------------------------|-------------|--------------------|--------------------|
| <b>Incident Diabetes (N=1045)</b>   |             |                    |                    |
| Q4 [1263.4, 4650.4]                 | 45          | 1 (ref)            | 1 (ref)            |
| Q3 [965.6-1263.4]                   | 61          | 1.51 (1.02, 2.22)* | 1.31 (0.89, 1.94)  |
| Q2 [711.6-966.3]                    | 63          | 1.68 (1.14, 2.48)* | 1.44 (0.98, 2.13)  |
| Q1 [119.4-711.6]                    | 73          | 2.24 (1.51, 3.33)* | 1.61 (1.08, 2.42)* |
| p-value for trend                   |             | <0.001*            | 0.018*             |
| <b>CHD (N=1051)</b>                 |             |                    |                    |
| Q4 [1263.4, 4650.4]                 | 32          | 1 (ref)            | 1 (ref)            |
| Q3 [965.6-1263.4]                   | 35          | 1.05 (0.65, 1.70)  | 1.11 (0.68, 1.80)  |
| Q2 [711.6-966.3]                    | 35          | 1.08 (0.66, 1.75)  | 1.13 (0.70, 1.84)  |
| Q1 [119.4-711.6]                    | 48          | 1.65 (1.03, 2.65)* | 2.02 (1.24, 3.29)* |
| p-value for trend                   |             | 0.057              | 0.012*             |
| <b>Ischemic Stroke (N=1051)</b>     |             |                    |                    |
| Q4 [1263.4, 4650.4]                 | 9           | 1 (ref)            | 1 (ref)            |
| Q3 [965.6-1263.4]                   | 10          | 0.99 (0.40, 2.46)  | 1.02 (0.41, 2.53)  |
| Q2 [711.6-966.3]                    | 4           | 0.32 (0.10, 1.09)  | 0.33 (0.10, 1.10)  |
| Q1 [119.4-711.6]                    | 9           | 0.61 (0.22, 1.70)  | 0.65 (0.23, 1.84)  |
| p-value for trend                   |             | 0.168              | 0.196              |
| <b>All-Cause Mortality (N=1051)</b> |             |                    |                    |
| Q4 [1263.4, 4650.4]                 | 30          | 1 (ref)            | 1 (ref)            |
| Q3 [965.6-1263.4]                   | 31          | 0.98 (0.59, 1.63)  | 0.98 (0.59, 1.63)  |
| Q2 [711.6-966.3]                    | 39          | 1.19 (0.73, 1.94)  | 1.18 (0.73, 1.92)  |
| Q1 [119.4-711.6]                    | 56          | 1.78 (1.11, 2.86)* | 1.77 (1.08, 2.89)* |
| p-value for trend                   |             | 0.014*             | 0.022*             |

\* p-value < 0.05

† Model 1: Adjusted for age, race, sex

‡ Model 2: Adjusted for Framingham Risk Score (which includes age (years), sex, current smoker, systolic blood pressure (mmHg), total cholesterol (mg/dL), HDL cholesterol (mg/dL), diabetes status), plus c-reactive protein (mg/L), BMI (kg/m<sup>2</sup>), and race group

SUPPLEMENTARY DATA

**Supplementary Table 4.** Hazard ratios by incident diabetes, coronary heart disease, ischemic stroke, and mortality by sRAGE quartile excluding cases with diagnosed and undiagnosed diabetes at baseline, Black Race Only.

|                                       | # of Events | HR Model 1†        | HR Model 2‡        |
|---------------------------------------|-------------|--------------------|--------------------|
| <b>Incident Diabetes (N=207)</b>      |             |                    |                    |
| Q4 [1263.4, 4650.4]                   | 5           | 1 (ref)            | 1 (ref)            |
| Q3 [965.6-1263.4]                     | 7           | 0.80 (0.25, 2.53)  | 0.82 (0.26, 2.59)  |
| Q2 [711.6-966.3]                      | 17          | 1.29 (0.47, 3.50)  | 1.15 (0.42, 3.15)  |
| Q1 [119.4-711.6]                      | 33          | 1.34 (0.52, 3.45)  | 1.22 (0.47, 3.18)  |
| p-value for trend                     |             | 0.303              | 0.455              |
| <b>Coronary heart disease (N=261)</b> |             |                    |                    |
| Q4 [1263.4, 4650.4]                   | 6           | 1 (ref)            | 1 (ref)            |
| Q3 [965.6-1263.4]                     | 5           | 0.39 (0.12, 1.28)  | 0.44 (0.13, 1.44)  |
| Q2 [711.6-966.3]                      | 6           | 0.23 (0.07, 0.73)* | 0.24 (0.07, 0.79)* |
| Q1 [119.4-711.6]                      | 19          | 0.39 (0.15, 0.98)* | 0.49 (0.19, 1.28)  |
| p-value for trend                     |             | 0.135              | 0.314              |
| <b>Ischemic Stroke (N=261)</b>        |             |                    |                    |
| Q4 [1263.4, 4650.4]                   | 1           | 1 (ref)            | 1 (ref)            |
| Q3 [965.6-1263.4]                     | 2           | 0.95 (0.09, 10.52) | 1.07 (0.10, 11.88) |
| Q2 [711.6-966.3]                      | 6           | 1.49 (0.18, 12.60) | 0.95 (0.11, 8.40)  |
| Q1 [119.4-711.6]                      | 10          | 1.27 (0.16, 10.06) | 1.21 (0.15, 9.67)  |
| p-value for trend                     |             | 0.759              | 0.765              |
| <b>All-Cause Mortality (N=261)</b>    |             |                    |                    |
| Q4 [1263.4, 4650.4]                   | 3           | 1 (ref)            | 1 (ref)            |
| Q3 [965.6-1263.4]                     | 5           | 0.73 (0.17, 3.07)  | 0.83 (0.20, 3.49)  |
| Q2 [711.6-966.3]                      | 12          | 0.74 (0.21, 2.67)  | 0.74 (0.20, 2.75)  |
| Q1 [119.4-711.6]                      | 37          | 1.37 (0.42, 4.49)  | 1.43 (0.43, 4.75)  |
| p-value for trend                     |             | 0.139              | 0.166              |

\* p-value < 0.05

† Model 1: Adjusted for age, race, sex

‡ Model 2: Adjusted for Framingham Risk Score (which includes age (years), sex, current smoker, systolic blood pressure (mmHg), total cholesterol (mg/dL), HDL cholesterol (mg/dL), diabetes status), plus c-reactive protein (mg/L), BMI (kg/m<sup>2</sup>), and race group

SUPPLEMENTARY DATA

**Supplementary Table 5.** Hazard ratios by incident diabetes, coronary heart disease, ischemic stroke, and mortality by sRAGE quartile excluding cases with diagnosed and undiagnosed diabetes at baseline, White Race Only.

|                                       | # of Events | HR Model 1†        | HR Model 2‡        |
|---------------------------------------|-------------|--------------------|--------------------|
| <b>Incident Diabetes (N=850)</b>      |             |                    |                    |
| Q4 [1263.4, 4650.4]                   | 40          | 1 (ref)            | 1 (ref)            |
| Q3 [965.6-1263.4]                     | 57          | 1.71 (1.14, 2.57)* | 1.41 (0.93, 2.12)  |
| Q2 [711.6-966.3]                      | 49          | 1.75 (1.15, 2.66)* | 1.42 (0.93, 2.17)  |
| Q1 [119.4-711.6]                      | 45          | 2.57 (1.67, 3.98)* | 1.64 (1.05, 2.55)* |
| p-value for trend                     |             | <0.001*            | 0.031*             |
| <b>Coronary heart disease (N=940)</b> |             |                    |                    |
| Q4 [1263.4, 4650.4]                   | 31          | 1 (ref)            | 1 (ref)            |
| Q3 [965.6-1263.4]                     | 39          | 1.20 (0.75, 1.93)  | 1.16 (0.72, 1.88)  |
| Q2 [711.6-966.3]                      | 43          | 1.50 (0.94, 2.39)  | 1.48 (0.93, 2.36)  |
| Q1 [119.4-711.6]                      | 43          | 2.01 (1.26, 3.21)* | 2.16 (1.33, 3.50)* |
| p-value for trend                     |             | 0.003*             | 0.002*             |
| <b>Ischemic Stroke (N=940)</b>        |             |                    |                    |
| Q4 [1263.4, 4650.4]                   | 11          | 1 (ref)            | 1 (ref)            |
| Q3 [965.6-1263.4]                     | 10          | 0.93 (0.39, 2.20)  | 0.76 (0.32, 1.82)  |
| Q2 [711.6-966.3]                      | 7           | 0.76 (0.29, 1.98)  | 0.57 (0.22, 1.49)  |
| Q1 [119.4-711.6]                      | 6           | 0.91 (0.33, 2.50)  | 0.63 (0.22, 1.78)  |
| p-value for trend                     |             | 0.702              | 0.254              |
| <b>All-Cause Mortality (N=940)</b>    |             |                    |                    |
| Q4 [1263.4, 4650.4]                   | 34          | 1 (ref)            | 1 (ref)            |
| Q3 [965.6-1263.4]                     | 38          | 1.09 (0.68, 1.73)  | 1.02 (0.64, 1.63)  |
| Q2 [711.6-966.3]                      | 43          | 1.40 (0.89, 2.20)  | 1.18 (0.75, 1.87)  |
| Q1 [119.4-711.6]                      | 41          | 1.85 (1.17, 2.94)* | 1.61 (1.00, 2.61)  |
| p-value for trend                     |             | 0.007*             | 0.057              |

\* p-value < 0.05

† Model 1: Adjusted for age, race, sex

‡ Model 2: Adjusted for Framingham Risk Score (which includes age (years), sex, current smoker, systolic blood pressure (mmHg), total cholesterol (mg/dL), HDL cholesterol (mg/dL), diabetes status), plus c-reactive protein (mg/L), BMI (kg/m<sup>2</sup>), and race group

SUPPLEMENTARY DATA

**Supplementary Figure 1.** Kernel density plots of the sRAGE distribution at baseline. A, Overall. B, By hypertension status. C, By diabetes status. D, By Race.

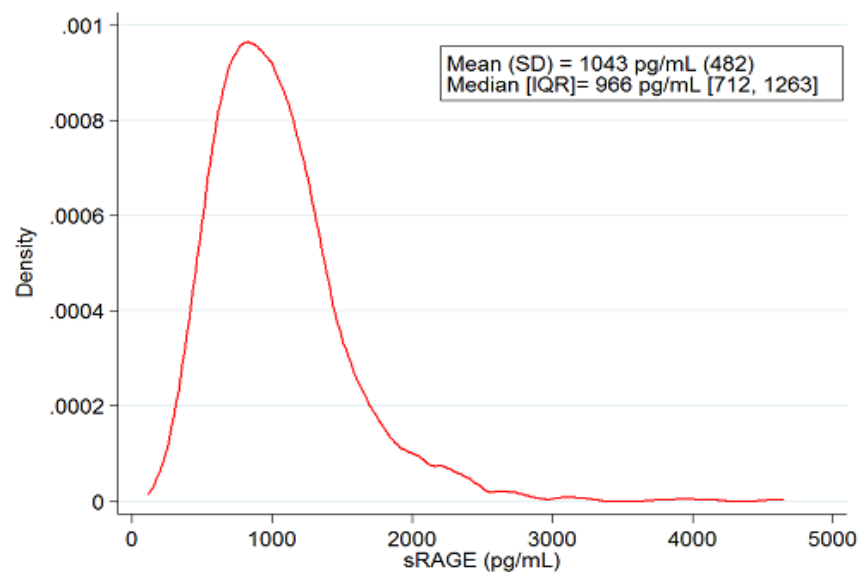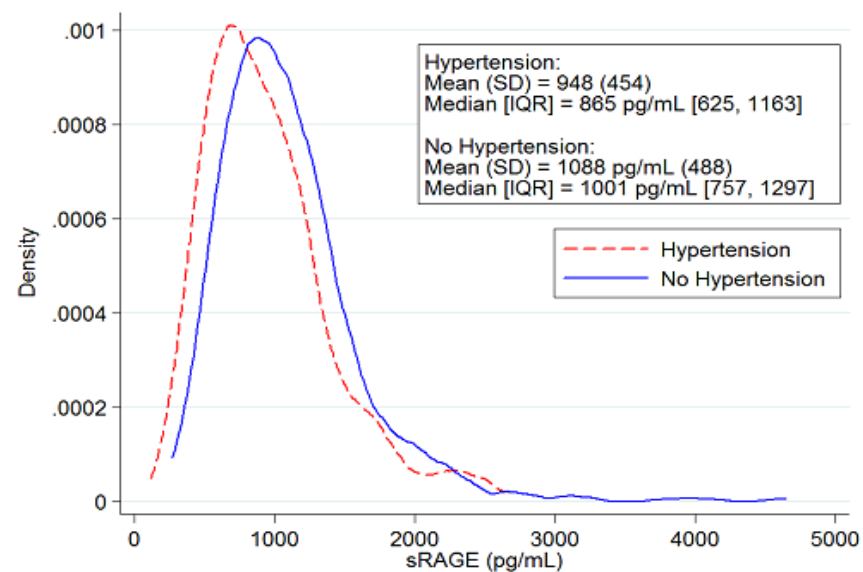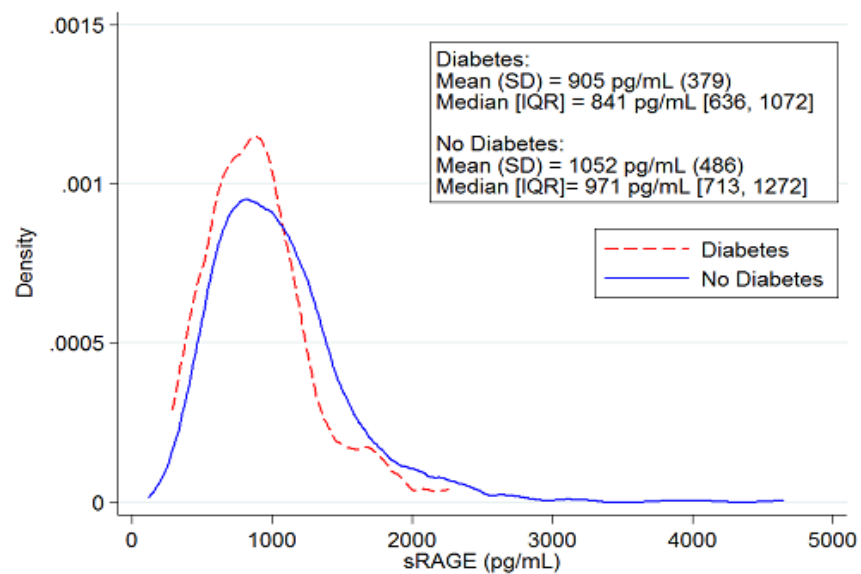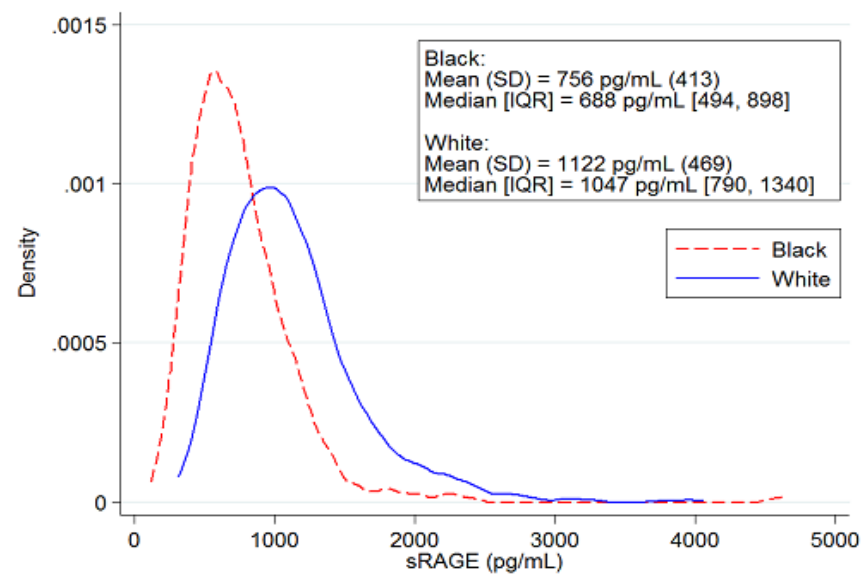

Supplement: supp_db12-1528_DB121528SupplementaryData.pdf [file supp_db12-1528_DB121528SupplementaryData.pdf]
